# Supplementary material for: Assessing Risks to Wildlife from Free-Roaming Hybrid Cats: The Proposed Introduction of Pet Savannah Cats to Australia as a Case Study
Source: PubMed Central journal article supplement (PMC6826879; doi:10.3390/ani9100795), 2019-10-14
Supplement: animals-09-00795-s001.pdf [file animals-09-00795-s001.pdf]

**Supplementary Table S1: Australian terrestrial mammal species assessed as more susceptible to predation from savannah cats than domestic cats.**

We assume that any mammal species assessed as at risk of predation by the domestic cat will be at least as susceptible to predation by the savannah cat (SC). Only those mammal species assessed as more susceptible to predation by savannah cats than by domestic cats are listed here. The full list of all mammal species assessed is provided in Table S1 of Radford et al. 2018 [53]. Female body weight data are mostly from Van Dyck and Strahan 2008 [62], with data on species described since 2008 obtained from the primary sources.

| Species                         | Common Name                 | Female Body Weight (g) | Conservation Status (IUCN) [46] | Susceptibility to Domestic Cat Predation * | Susceptibility to Savannah Cat Predation | Reason for Change                                                                                                     |
|---------------------------------|-----------------------------|------------------------|---------------------------------|--------------------------------------------|------------------------------------------|-----------------------------------------------------------------------------------------------------------------------|
| <i>Ornithorhynchus anatinus</i> | Platypus                    | 600–1700               | NT                              | Not susceptible                            | High                                     | Occupies riparian areas, dense vegetation                                                                             |
| <i>Zaglossus bruijnii</i>       | Western long-beaked echidna | ~5000                  | CR                              | Not susceptible                            | Low                                      | Weight range places it at high potential susceptibility to SC predation, but spines provide some protection           |
| <i>Dasyurus maculatus</i>       | Spotted-tailed Quoll        | 900–2500               | NT                              | Low                                        | High                                     | Partly arboreal, occupies dense wet forests                                                                           |
| <i>Sarcophilus harrisii</i>     | Tasmanian devil             | 5000–9000              | EN                              | Not susceptible                            | Low                                      | Weight range places it at high potential susceptibility to SC predation, but pugnacious behaviour reduces risk to low |
| <i>Antechinus adustus</i>       | Rusty antechinus            | 18–35                  | LC                              | Not susceptible                            | Low                                      | Occupies rainforest, some activity high above ground                                                                  |
| <i>Antechinus godmani</i>       | Atherton antechinus         | 42–78                  | NT                              | Not susceptible                            | Low                                      | Occupies rainforest, some activity high above ground                                                                  |
| <i>Antechinus leo</i>           | Cinnamon antechinus         | 32–74                  | LC                              | Not susceptible                            | Low                                      | Occupies rainforest, some activity high above ground                                                                  |
| <i>Antechinus mysticus</i>      | Buff-footed antechinus      | 18–34                  | LC                              | Not susceptible                            | Low                                      | Occupies rainforest, some activity likely to be high above ground                                                     |
| <i>Antechinus subtropicus</i>   | Subtropical antechinus      | 16–32                  | LC                              | Not susceptible                            | Low                                      | Occupies rainforest, some activity high above ground                                                                  |
| <i>Myrmecobius fasciatus</i>    | Numbat                      | 305–647                | EN                              | Low                                        | High                                     | Weight range places it at high potential susceptibility to SC predation                                               |
| <i>Echymipera rufescens</i>     | Long-nosed echymipera       | 300–1200               | LC                              | Low                                        | High                                     | Occupies rainforest, weight range places it at high potential susceptibility to SC predation                          |
| <i>Isoodon macrourus</i>        | Northern brown bandicoot    | 500–1700               | LC                              | Low                                        | High                                     | Often occupies dense vegetation, weight range places it at high potential susceptibility to SC predation              |
| <i>Isoodon obesulus</i>         | Southern brown bandicoot    | 400–1200               | NT                              | Low                                        | High                                     | Often occupies dense vegetation, weight range                                                                         |

|                                 |                               |             |    |                 |      |                                                                                                                 |
|---------------------------------|-------------------------------|-------------|----|-----------------|------|-----------------------------------------------------------------------------------------------------------------|
|                                 |                               |             |    |                 |      | places it at high potential susceptibility to SC predation                                                      |
| <i>Isoodon fusciventer</i>      | Quenda                        | 400–1100    | LC | Low             | High | Often occupies dense vegetation, weight range places it at high potential susceptibility to SC predation        |
| <i>Isoodon peninsulae</i>       | Cape York brown bandicoot     | 350–1050    | LC | Low             | High | Often occupies dense vegetation, weight range places it at high potential susceptibility to SC predation        |
| <i>Perameles pallescens</i>     | Northern long-nosed bandicoot | 350–950     | LC | Low             | High | Often occupies dense vegetation, weight range places it at high potential susceptibility to SC predation        |
| <i>Phascolarctos cinereus</i>   | Koala                         | 7000–11,000 | VU | Not susceptible | Low  | Weight range places it at some risk to SC predation, mostly active high above ground                            |
| <i>Dactylopsila trivirgata</i>  | Striped possum                | 310–475     | LC | Low             | High | Occupies rainforest, often active near ground                                                                   |
| <i>Petaurus gracilis</i>        | Mahogany glider               | 310–454     | EN | Not susceptible | Low  | Usually active > 4 m above ground                                                                               |
| <i>Petropseudes dahli</i>       | Rock ringtail possum          | 1280–2000   | LC | Low             | High | Much activity in trees < 4 m above ground                                                                       |
| <i>Trichosurus caninus</i>      | Short-eared brushtail possum  | 2500–4500   | LC | Low             | High | Often active on ground in dense forest, weight range places it at high potential susceptibility to SC predation |
| <i>Trichosurus cunninghami</i>  | Mountain brushtail possum     | 2600–4200   | LC | Low             | High | Often active on ground in dense forest, weight range places it at high potential susceptibility to SC predation |
| <i>Trichosurus vulpecula</i>    | Common brushtail possum       | 1200–3500   | LC | Low             | High | Often active on ground in dense forest, weight range places it at high potential susceptibility to SC predation |
| <i>Wyulda squamicaudata</i>     | Scaly-tailed possum           | 900–2000    | NT | Low             | High | Much activity in trees < 4 m above ground                                                                       |
| <i>Hypsiprymmodon moschatus</i> | Musky rat-kangaroo            | 453–635     | LC | Low             | High | Occupies rainforest, weight range places it at high potential susceptibility to SC predation                    |
| <i>Aepyprymnus rufescens</i>    | Rufous bettong                | 1300–3000   | LC | Low             | High | Part of range overlaps dense forest, weight range places it at high potential susceptibility to SC predation    |
| <i>Bettongia gaimardi</i>       | Eastern bettong               | 1200–2250   | NT | Low             | High | Part of range overlaps dense forest, weight range places it at high potential susceptibility to SC predation    |
| <i>Dendrolagus bennettianus</i> | Bennett's tree-kangaroo       | 6300–10,600 | NT | Not susceptible | Low  | Occupies rainforest, mostly active > 4 m above ground                                                           |

|                                    |                           |               |    |                 |      |                                                                                                                                                 |
|------------------------------------|---------------------------|---------------|----|-----------------|------|-------------------------------------------------------------------------------------------------------------------------------------------------|
| <i>Dendrolagus lumholtzi</i>       | Lumholtz's tree-kangaroo  | 5100–7750     | NT | Not susceptible | Low  | Occupies rainforest, mostly active > 4 m above ground                                                                                           |
| <i>Lagorchestes conspicillatus</i> | Spectacled hare-wallaby   | 1600–4750     | LC | Low             | High | Weight range places it at high potential susceptibility to SC predation                                                                         |
| <i>Notamacropus agilis</i>         | Agile wallaby             | 9000–15,000   | LC | Not susceptible | Low  | Weight range places it at low potential susceptibility to SC predation                                                                          |
| <i>Notamacropus dorsalis</i>       | Black-striped wallaby     | 5200–7600     | LC | Not susceptible | High | Weight range places it at high potential susceptibility to SC predation                                                                         |
| <i>Notamacropus eugenii</i>        | Tammar wallaby            | 4000–6000     | LC | Low             | High | Weight range places it at high potential susceptibility to SC predation                                                                         |
| <i>Notamacropus irma</i>           | Western brush wallaby     | 7000–9000     | LC | Low             | High | Weight range places it at intermediate potential susceptibility to SC predation, high risk associated with occupation of wet flats and thickets |
| <i>Notamacropus parma</i>          | Parma wallaby             | 3200–4800     | NT | Not susceptible | High | Weight range places it at high potential susceptibility to SC predation                                                                         |
| <i>Notamacropus parryi</i>         | Whiptail wallaby          | 7000–15,000   | LC | Not susceptible | Low  | Weight range places it mostly at low potential susceptibility to SC predation                                                                   |
| <i>Notamacropus rufogriseus</i>    | Red-necked wallaby        | 11,000–15,500 | LC | Not susceptible | Low  | Weight range places it at low potential susceptibility to SC predation                                                                          |
| <i>Osphranter bernardus</i>        | Black wallaroo            | 13,000        | NT | Not susceptible | Low  | Weight range places it at low potential susceptibility to SC predation                                                                          |
| <i>Onychogalea fraenata</i>        | Bridled nailtail wallaby  | 4000–6000     | EN | Low             | High | Weight range places it at high potential susceptibility to SC predation                                                                         |
| <i>Onychogalea unguifera</i>       | Northern nailtail wallaby | 4500–7000     | LC | Low             | High | Weight range places it at high potential susceptibility to SC predation                                                                         |
| <i>Petrogale herberti</i>          | Herbert's rock-wallaby    | 3700–4900     | LC | Not susceptible | Low  | Weight range places it at high potential susceptibility to SC predation, but its rock outcrop habitat likely reduces risk to low                |
| <i>Petrogale inornata</i>          | Unadorned rock-wallaby    | 3100–5000     | LC | Not susceptible | Low  | Weight range places it at high potential susceptibility to SC predation, but its rock outcrop habitat likely reduces risk to low                |
| <i>Petrogale</i>                   | Proserpine rock-          | 3500–8100     | EN | Not             | Low  | Weight range places it                                                                                                                          |

|                                 |                            |               |    |                 |      |  |                                                                                                                                                 |
|---------------------------------|----------------------------|---------------|----|-----------------|------|--|-------------------------------------------------------------------------------------------------------------------------------------------------|
| <i>persephone</i>               | wallaby                    |               |    | susceptible     |      |  | at high potential susceptibility to SC predation, but its rock outcrop habitat likely reduces risk to low                                       |
| <i>Petrogale purpureicollis</i> | Purple-necked rock-wallaby | 2700–5700     | NT | Not susceptible | Low  |  | Weight range places it at high potential susceptibility to SC predation, but its rock outcrop habitat likely reduces risk to low                |
| <i>Thylogale billardieri</i>    | Tasmanian pademelon        | 2400–10,000   | LC | Low             | High |  | Occupies rainforest / wet forest with dense understorey, weight range places it mostly at high potential susceptibility to SC predation         |
| <i>Thylogale stigmatica</i>     | Red-legged pademelon       | 2500–4200     | LC | Low             | High |  | Occupies rainforest / wet forest with dense understorey, weight range places it at high potential susceptibility to SC predation                |
| <i>Thylogale thetis</i>         | Red-necked pademelon       | 1800–4300     | LC | Low             | High |  | Occupies rainforest / wet forest with dense understorey, weight range places it at high potential susceptibility to SC predation                |
| <i>Setonix brachyurus</i>       | Quokka                     | 1600–3500     | VU | Low             | High |  | Mostly confined on mainland to dense vegetation in high rainfall areas, weight range places it at high potential susceptibility to SC predation |
| <i>Wallabia bicolor</i>         | Swamp wallaby              | 10,300–15,400 | LC | Not susceptible | Low  |  | Weight range places it at low potential susceptibility to SC predation                                                                          |
| <i>Mastacomys fuscus</i>        | Broad-toothed rat          | 97–145        | NT | Low             | High |  | Occupies dense wet, often riparian habitats                                                                                                     |
| <i>Pseudomys nanus</i>          | Western chestnut mouse     | 18–56         | LC | Low             | High |  | Occupies varied habitats with dense understorey                                                                                                 |
| <i>Hydromys chrysogaster</i>    | Water-rat                  | 340 – 992     | LC | Low             | High |  | Occupies riparian areas, often with dense vegetation                                                                                            |
| <i>Xeromys myoides</i>          | Water mouse                | 32–64         | VU | Low             | High |  | Occupies coastal and riparian areas, often with dense vegetation                                                                                |
| <i>Melomys burtoni</i>          | Grassland melomys          | 26–97         | LC | Low             | High |  | Occupies dense vegetation in high rainfall coastal areas, much activity < 4 m above ground                                                      |
| <i>Melomys capensis</i>         | Cape York melomys          | 45–96         | LC | Not susceptible | High |  | Occupies rainforest and other wet forest, much activity < 4 m above ground                                                                      |
| <i>Melomys cervinipes</i>       | Fawn-footed melomys        | 45–120        | LC | Not susceptible | High |  | Occupies dense vegetation in high rainfall coastal areas,                                                                                       |

|                              |                        |         |    |                 |      |                                                                                                                                                 |
|------------------------------|------------------------|---------|----|-----------------|------|-------------------------------------------------------------------------------------------------------------------------------------------------|
|                              |                        |         |    |                 |      | much activity < 4 m above ground                                                                                                                |
| <i>Uromys caudimaculatus</i> | Giant white-tailed rat | 500–800 | LC | Not susceptible | High | Occupies rainforest and other wet forest, much activity < 4 m above ground                                                                      |
| <i>Uromys hadrourus</i>      | Pygmy white-tailed rat | 152–220 | NT | Not susceptible | High | Occupies rainforest, much activity likely to be < 4 m above ground                                                                              |
| <i>Pogonomys sp.</i>         | Tree mouse             | 40–79   | LC | Not susceptible | Low  | Occupies rainforest, much activity likely to be > 4 m above ground                                                                              |
| <i>Rattus leucopus</i>       | Cape York rat          | 95–207  | LC | Not susceptible | Low  | Occupies rainforest, but much activity in logs, under litter or in burrows may reduce potential susceptibility to SC predation from high to low |
| <i>Rattus tunneyi</i>        | Pale field-rat         | 42–85   | LC | Low             | High | Occupies tall grassland, usually near watercourses                                                                                              |

\* Radford et al. 2018 [53] assessed predator susceptibility to both the domestic cat and red fox together. We used evidence based on the relative impacts of foxes and cats in [53] to identify the susceptibility of each mammal species to domestic cat predation alone. For example, if a species was assessed as highly susceptible to predation by cats and foxes in [53], with the impact of foxes rated as being stronger than that of cats (cat < fox), we conservatively rated the susceptibility of that species to cats alone as low. If a species was assessed as being of high or low susceptibility to predation by cats and foxes in [53], with the impact of foxes being equal to that of cats (cat = fox), the susceptibility of that species to cats alone remained unchanged. IUCN conservation status: LC = Least Concern, NT = Near Threatened, VU = Vulnerable, EN = Endangered, CR = Critically Endangered.

## References

62. Van Dyck, S.; Strahan, R. *The Mammals of Australia*, 4th edition; Reed New Holland: Sydney, Australia, 2008.
